# Supplementary material for: The accuracy of healthcare worker versus self collected (2-in-1) Oropharyngeal and Bilateral Mid-Turbinate (OPMT) swabs and saliva samples for SARS-CoV-2
Source: PubMed Central journal article supplement (PMC7744114; doi:10.1371/journal.pone.0244417), 2020-12-16
Supplement: pone.0244417.s001.pdf [file pone.0244417.s001.pdf]

## **Provisional Protocol for Saliva sample collected in Lucence SAFER kit**

### **Reagents:**

Liquefaction reagent (1M DTT in 1x PBS) :

- Stock solution 1x PBS pH 6.8
- Prepare fresh: Weigh out 1.54g of DTT power and add into a 50ml tube. Dissolve in 8ml 1 X PBS and top up to 10ml mark with 1xPBS (this is sufficient for 12 samples)
- DTT: Goldbio CAS no (27565-41-9 / 3483-12-3)

Extraction kit:

- PerkinElmer® Nucleic Acid Extraction Kit (SY609)

Real-time PCR kit:

- PerkinElmer® SARS-CoV-2 Real-time RT-PCR Assay (COVID-19-PCR-AUS-C)

### **Instrument:**

- PerkinElmer® Pre-Nat II Automated Workstation (For Extraction and PCR setup)
- Thermo Fisher Scientific QuantStudio™ 5 Real Time PCR System

### **Procedure**

- 1) Add 750ul of liquefaction solution into each saliva sample (containing 2ml saliva and 2ml stabilization solution)
- 2) Vortex samples for 20 s and let it stand at room temperature for at least 15minutes prior to processing.
- 3) Aliquot appropriate amount of for processing. Minimal, 700ul is aliquoted to secondary tube to be processed on Pre-Nat II following manufacturer's instructions. 400ul of samples will be processed on the Pre-Nat II
- 4) Sample is eluted in 60ul of elution buffer (Tris-HCL)
- 5) Final reaction volume: 20ul of master mix and 40ul of eluted RNA.
- 6) Tubes are cap and run on QuantStudio 5 following manufacturer's instructions.

## Run and analysis parameters for QuantStudio™ 5

Experiment method:

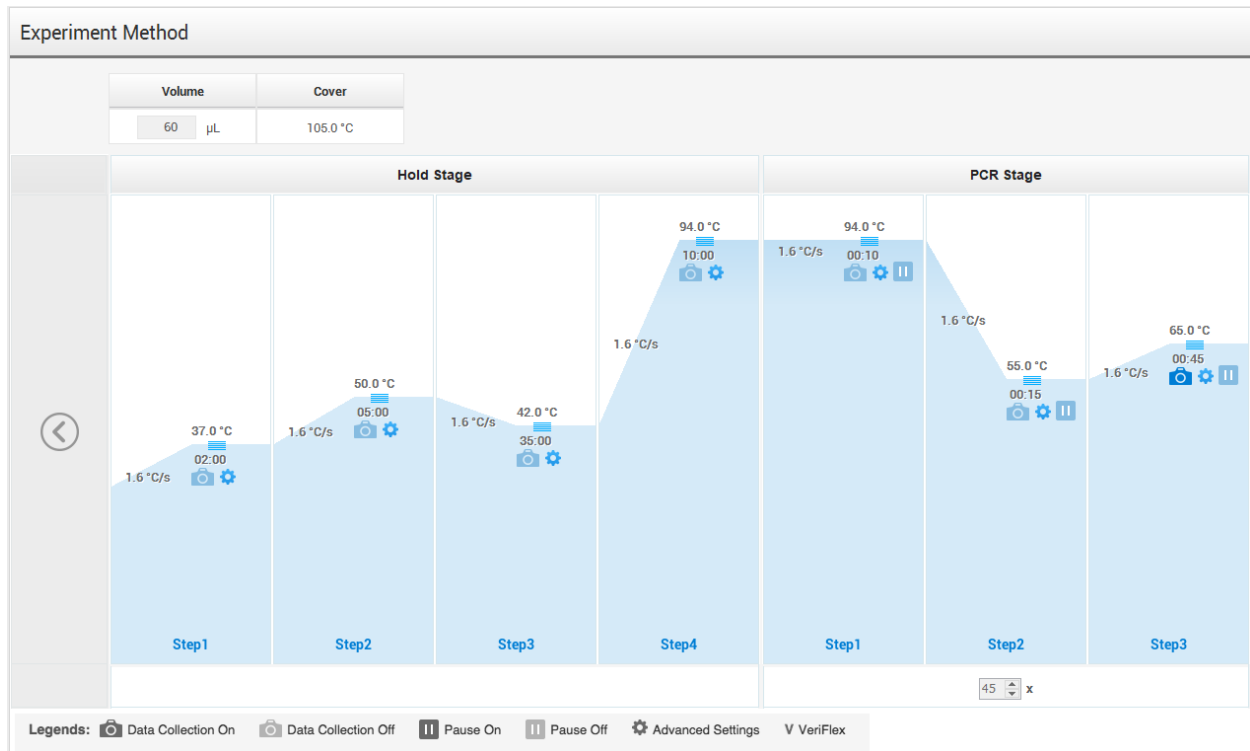

Targets assignment:

### Assign Targets and Samples

**Quick Setup** **Advanced Setup**

**Well Attributes**

Sample:

Target:

Well Comments:

---

**Plate Attributes**

Passive Reference:

| Quick Setup                         |        | Advanced Setup |          |          |            |          |
|-------------------------------------|--------|----------------|----------|----------|------------|----------|
| Targets                             |        |                |          | + Add    | ✎ Action ▼ |          |
|                                     | Name   | Reporter       | Quencher | Comments | Task       | Quantity |
| <input checked="" type="checkbox"/> | N      | FAM            | None     |          | U ▼        | ✕        |
| <input checked="" type="checkbox"/> | IC     | VIC            | None     |          | U ▼        | ✕        |
| <input checked="" type="checkbox"/> | ORF1ab | ROX            | None     |          | U ▼        | ✕        |

### Analysis Parameters:

Analysis Settings for SARs-CoV-2

Cr Settings | Flag Settings | Advanced Settings | Standard Curve Settings

**Data Step Selection**  
 Select the step and stage to use for Cr analysis. Only stage/step combinations for which data suitable for Cr analysis have been collected are displayed.  
 PCR Stage/Step: Stage2, Step3

**Algorithm Settings**  
 Baseline Threshold ▼

**Default Cr Settings**  
 Default Cr settings are used to calculate the Cr for targets without custom settings. To edit the default settings, click **Edit Default Settings**.  
 Threshold: AUTO Baseline Start Cycle: AUTO Baseline End Cycle: AUTO **Edit Default Settings**

| Target | Threshold | Baseline Start | Baseline End |
|--------|-----------|----------------|--------------|
| IC     | 5,000     | AUTO           | AUTO         |
| N      | 50,000    | AUTO           | AUTO         |
| ORF1ab | 50,000    | AUTO           | AUTO         |

**Cr Settings for IC**  
 Cr Settings to Use:  Default Settings  
 Automatic Threshold  
 Threshold: 5,000.0  
 Automatic Baseline  
 Baseline Start Cycle: 3 End Cycle: 15

### Results analysis:

User would still need to check amplification curve that they follow the sigmoidal curve for proper amplification before interpretation based on the Ct value.

| Control  | Ct            |               |              |
|----------|---------------|---------------|--------------|
|          | N (FAM)       | ORF1ab (ROX)  | IC (HEX/VIC) |
| Negative | Undet or > 42 | Undet or > 42 | Ct ≤ 40      |
| Positive | ≤ 35          | ≤ 35          | /            |

Undet: Undetermined;

| Ct           |                           | Result interpretation                                                                                    |
|--------------|---------------------------|----------------------------------------------------------------------------------------------------------|
| IC (VIC/HEX) | N (FAM), ORF1ab (ROX)     |                                                                                                          |
| ≤40          | Both targets Undet or >42 | SARS-CoV-2 not detected                                                                                  |
| /            | Both targets ≤ 42         | SARS-CoV-2 detected                                                                                      |
| /            | One of the targets ≤ 42   | Specimen needs to be re-tested from re-extraction                                                        |
| >40 or Undet | Both targets Undet or >42 | Invalid result, specimen needs to be re-tested from re-extraction or re-collected from patient for test. |

Undet: Undetermined;

/: No requirements on the Ct value;
